# Supplementary material for: Eco-friendly differential pulse voltammetric determination of benzydamine hydrochloride using a gold nanoparticles-modified carbon paste electrode
Source: Royal Society of Chemistry journal article supplement (doi:10.1039/d6ra02390h), 2026-05-11
Supplement: d6ra02390h1.pdf [file d6ra02390h1.pdf]

## Supplementary Material

### Eco-Friendly Differential Pulse Voltammetric Determination of Benzydamine Hydrochloride Using a Gold Nanoparticles-Modified Carbon Paste Electrode

Maryam A. Bakr<sup>1,2</sup>, Samah S. Abbas<sup>3</sup>, Maha A. Hegazy<sup>2</sup>, Amr M. Badawey<sup>3</sup> and Sally S. El-Mosallamy<sup>3,\*</sup>.

<sup>1</sup> Postgraduate program, Pharmaceutical Analytical Chemistry Department, Faculty of Pharmacy, Cairo University, Kasr El-Aini St., 11562 Cairo, Egypt

<sup>2</sup> Pharmaceutical Chemistry Department, Faculty of Pharmacy, Future University in Egypt, 90<sup>th</sup> St., Fifth Settlement, New Cairo, 11835 Cairo, Egypt

<sup>3</sup> Pharmaceutical Analytical Chemistry Department, Faculty of Pharmacy, Cairo University, Kasr El-Aini St., 11562 Cairo, Egypt

\* Corresponding author

## Experimental

### *Materials and Reagents*

- 0.01 M H<sub>2</sub>SO<sub>4</sub> was prepared by transferring 543.0 μL from 18.4 M H<sub>2</sub>SO<sub>4</sub> into 1.0 L measuring flask and the volume completed to mark with distilled water and used as the supporting electrolyte.
- Britton-Robinson buffer solution was prepared by mixing a solution of 0.04 M phosphoric acid, 0.04 M acetic acid, and 0.04 M boric acid, and used for the pH study. The desired pH was achieved in buffer solutions by the controlled addition of 0.2 M sodium hydroxide which was prepared by dissolving 0.8 gm NaOH in 100 mL distilled water.
- 0.1 M potassium chloride was prepared by dissolving 0.75 gm KCl in 100 mL distilled water.
- Artificial saliva was prepared by dissolving 0.639 g Na<sub>3</sub>PO<sub>4</sub>, 0.250 g NaCl, 1.340 g KCl, 0.007 g MgCl<sub>2</sub>, 0.122 g CaCl<sub>2</sub>, 0.007 g H<sub>2</sub>SO<sub>4</sub> and 0.274 g NaHCO<sub>3</sub> in 250 mL of high purity distilled water in a 500-mL beaker using a vortex. Potassium hydroxide used for the pH adjustment to 7.2. The solution was then transferred to a 1.0-L measuring flask and completed to the mark with high-purity distilled water and the flask was sonicated for 15 min.

### *Procedure*

#### *Electrodes Preparation*

- **Au-NPs/GCE:** Gold nanoparticles (Au-NPs) were electrodeposited onto a glassy carbon electrode (GCE) using chronoamperometry. Prior to deposition, the GCE was carefully polished with alumina slurry and ultrasonically cleaned in deionized water. The electrodeposition was carried out in  $5.00 \times 10^{-4}$  M HAuCl<sub>4</sub> solution containing 0.1 M KCl. A constant potential of -0.4 V vs. Ag/AgCl was applied for a deposition time of 5 s to obtain a uniform dispersion of Au-NPs on the GCE surface. The resulting electrode is denoted as Au-NPs/GCE.
- **Au-NPs/CNT/CPE:** The carbon paste electrode (CPE) was first modified with carbon nanotubes (CNTs) to obtain a CNT/CPE substrate. Gold nanoparticles (Au-NPs) were then deposited onto the CNT/CPE surface via chronoamperometry, resulting in the final Au-

NPs/CNT/CPE electrode. The electrodeposition of Au-NPs was carried out by applying a constant potential ( $-0.4$  V vs. Ag/AgCl) for a deposition time 5 s from  $5.00 \times 10^{-4}$  M HAuCl<sub>4</sub> solution containing 0.1 M KCl.

**Table S1.** Elemental composition of EDX spectrum of Au-NPs electrodeposited on SPE.

| Element | Weight % | Atomic % | Net Int. | Error % | K ratio | Z      | A      | F      |
|---------|----------|----------|----------|---------|---------|--------|--------|--------|
| C K     | 92.86    | 97.98    | 2599.30  | 6.42    | 0.4105  | 1.0124 | 0.4366 | 1.0000 |
| Cl K    | 5.32     | 1.90     | 2227.10  | 1.28    | 0.0467  | 0.8394 | 1.0329 | 1.0113 |
| Au L    | 1.82     | 0.12     | 78.30    | 9.55    | 0.0121  | 0.5803 | 1.1066 | 1.0316 |

**Table S2.** Greenness assessment of the developed voltammetric method and the reported potentiometric and HPLC methods for determination of benzydamine hydrochloride by Analytical Eco-Scale.

|                                   |                                                           | Developed voltammetric method | Reported potentiometric method [35] | Reported HPLC method [24] |
|-----------------------------------|-----------------------------------------------------------|-------------------------------|-------------------------------------|---------------------------|
| Analytical Eco-Scale Parameters   |                                                           | Penalty points (PP)           |                                     |                           |
| Reagents                          | H <sub>2</sub> SO <sub>4</sub>                            | 2                             | -                                   | -                         |
|                                   | HAuCl <sub>4</sub> solution                               | 4                             | -                                   | -                         |
|                                   | KCl                                                       | 0                             | -                                   | -                         |
|                                   | Graphite powder                                           | 0                             | -                                   | -                         |
|                                   | Paraffin oil                                              | 2                             | -                                   | -                         |
|                                   | Tetrahydrofuran (THF)                                     | -                             | 6                                   | -                         |
|                                   | PVC                                                       | -                             | 0                                   | -                         |
|                                   | Potassium tetrakis (4-chlorophenyl) borate (KTCPB)        | -                             | 1                                   | -                         |
|                                   | 2-hydroxypropyl- $\beta$ -cyclodextrin (2HP- $\beta$ -CD) | -                             | 0                                   | -                         |
|                                   | Calix[4]arene                                             | -                             | 1                                   | -                         |
|                                   | Calix[6]arene                                             | -                             | 1                                   | -                         |
|                                   | 2-nitrophenyloctyl ether ( <i>o</i> -NPOE)                | -                             | 0                                   | -                         |
|                                   | Acetonitrile                                              | -                             | -                                   | 8                         |
|                                   | Methanol                                                  | -                             | -                                   | 12                        |
|                                   | Ammonium carbonate                                        | -                             | -                                   | 2                         |
|                                   | Ethyl acetate                                             | -                             | -                                   | 4                         |
| 0.1M Sodium Hydroxide             | -                                                         | -                             | 1                                   |                           |
| Instrument                        | LC-UV $\leq$ 1.5 KWh/sample                               | -                             | -                                   | 1                         |
|                                   | potentiostat/galvanostat <0.1 KWh/sample                  | 0                             | 0                                   | -                         |
|                                   | Centrifuge                                                | -                             | -                                   | 1                         |
|                                   | Shaker                                                    | -                             | -                                   | 1                         |
|                                   | Occupational hazards                                      | 0                             | 0                                   | 0                         |
|                                   | Waste                                                     | 8                             | 6                                   | 8                         |
| <b>Total penalty points</b>       |                                                           | <b>16</b>                     | <b>15</b>                           | <b>38</b>                 |
| <b>Analytical Eco-Scale score</b> |                                                           | <b>84</b>                     | <b>85</b>                           | <b>62</b>                 |

**Table S3.** Green analytical procedure index parameters for the proposed voltammetric method.

| Category                                  | Voltammetric method                                                                                                                                                                                                                                                                                                                             |
|-------------------------------------------|-------------------------------------------------------------------------------------------------------------------------------------------------------------------------------------------------------------------------------------------------------------------------------------------------------------------------------------------------|
| 1- Collection                             | Off-line                                                                                                                                                                                                                                                                                                                                        |
| 2- Preservation                           | None                                                                                                                                                                                                                                                                                                                                            |
| 3- Transport                              | None                                                                                                                                                                                                                                                                                                                                            |
| 4- Storage                                | None                                                                                                                                                                                                                                                                                                                                            |
| 5- Type of the method:<br>direct/indirect | Simple procedures                                                                                                                                                                                                                                                                                                                               |
| 6- Scale of extraction                    | None                                                                                                                                                                                                                                                                                                                                            |
| 7- Solvents/reagents                      | Benign solvent used                                                                                                                                                                                                                                                                                                                             |
| 8- Additional treatments                  | None                                                                                                                                                                                                                                                                                                                                            |
| <u>Reagents and solvents</u>              |                                                                                                                                                                                                                                                                                                                                                 |
| 9- Amounts                                | 10 - 100 mL                                                                                                                                                                                                                                                                                                                                     |
| 10- Health hazard                         | Paraffin oil: NFPA* health hazard rating = 2<br>H <sub>2</sub> SO <sub>4</sub> acid: NFPA* health hazard rating = 3<br>KCl: NFPA* health hazard rating = 1<br>Graphite powder: NFPA* health hazard rating = 0<br>HAuCl <sub>4</sub> : NFPA* health hazard rating = 3                                                                            |
| 11- Safety hazard                         | Paraffin oil: instability score = 0, flammability score = 1<br>H <sub>2</sub> SO <sub>4</sub> acid: instability score = 0, flammability score = 0<br>KCl: instability score = 0, flammability score = 0<br>Graphite powder: instability score = 0, flammability score = 0<br>HAuCl <sub>4</sub> : instability score = 0, flammability score = 0 |
| <u>Instrumentation</u>                    |                                                                                                                                                                                                                                                                                                                                                 |
| 12- Energy                                | ≤0.1 kWh per sample                                                                                                                                                                                                                                                                                                                             |
| 13- Occupational hazard                   | Hermetic sealing of analytical process                                                                                                                                                                                                                                                                                                          |
| 14- Waste                                 | > 10 mL/sample                                                                                                                                                                                                                                                                                                                                  |
| 15- Waste treatment                       | No treatment                                                                                                                                                                                                                                                                                                                                    |

\* National Fire Protection Association.
